# Supplementary material
Source: publisher figshare collection journal article supplement (https://tandf.figshare.com/ndownloader/files/12824486)
Supplement: Supplementary file 1 [file 12824486]

**Economic Burden of Hospital Admissions for Patients With Acute Bacterial Skin and Skin Structure  
Infections in the United States**

**Supplemental Materials**

**Supplementary Table 1. Excluded Secondary Diagnoses**

| <b>Diagnosis Category/Description</b>                           | <b>ICD-9-CM Code</b> |
|-----------------------------------------------------------------|----------------------|
| <i>Accidents due to natural and environmental factors</i>       |                      |
| Poisoning/toxic react due to venom animals/plants               | E905.X               |
| Other injury caused by animals                                  | E906.X               |
| <i>Acute respiratory infections</i>                             |                      |
| Acute nasopharyngitis (common cold)                             | 460.XX               |
| Acute sinusitis                                                 | 461.XX               |
| Acute pharyngitis                                               | 462.XX               |
| Acute tonsillitis                                               | 463.XX               |
| Acute laryngitis/tracheitis                                     | 464.XX               |
| Acute upper respiratory infection of multiple/unspecified sites | 465.XX               |
| Acute bronchitis/bronchiolitis                                  | 466.XX               |
| <i>Acute rheumatic fever</i>                                    |                      |
| Rheumatic fever without mention of heart involvement            | 390.XX               |
| Rheumatic fever with heart involvement                          | 391.XX               |
| Rheumatic chorea                                                | 392.XX               |
| <i>Appendicitis</i>                                             |                      |
| Acute appendicitis                                              | 540.XX               |
| Unqualified appendicitis                                        | 541.XX               |
| Other appendicitis                                              | 542.XX               |
| Other diseases of appendix                                      | 543.XX               |
| <i>Arthropathies and related disorders</i>                      |                      |
| Arthropathy associated with infections                          | 711.XX               |
| <i>Arthropod-borne viral diseases</i>                           |                      |
| Yellow fever                                                    | 060.XX               |
| Dengue                                                          | 061.XX               |
| Mosquito-borne viral encephalitis                               | 062.XX               |
| Tick-borne viral encephalitis                                   | 063.XX               |

|                                                                                    |                     |
|------------------------------------------------------------------------------------|---------------------|
| Viral encephalitis from other/unspecified arthropods                               | 064.XX              |
| Arthropod-borne hemorrhagic fever                                                  | 065.XX              |
| Other arthropod-borne viral disease                                                | 066.XX              |
| <i>Chronic obstructive pulmonary disease and allied conditions</i>                 |                     |
| Bronchitis, not specified as acute or chronic                                      | 490.XX              |
| <i>Chronic rheumatic heart disease</i>                                             |                     |
| Rheumatic disease of endocardium, valve unspecified                                | 397.9               |
| <i>Complications mainly related to pregnancy</i>                                   |                     |
| Infection of genitourinary tract antepartum                                        | 646.63              |
| Other specified maternal infection/parasitic disease, antepartum                   | 647.83              |
| Unspecified maternal infection/infestation, antepartum                             | 647.93              |
| Unspecified maternal infection/infestation complicating pregnancy/birth/postpartum | 647.94              |
| <i>Complications of surgical and medical care, NEC</i>                             |                     |
| Infection/inflammation due to internal device/implant/graft                        | 996.6X              |
| Ventilator associated pneumonia                                                    | 997.31              |
| Postoperative shock, septic                                                        | 998.02              |
| Bloodstream infection due to central venous catheter                               | 999.32              |
| Infection following other infusion/injury/transfusion/vaccination                  | 999.39              |
| <i>Complications of the puerperium</i>                                             |                     |
| Major puerperal infection, unspecified, postpartum condition or complication       | 670.04              |
| Puerperal sepsis, postpartum condition or complication                             | 670.24              |
| Other major puerperal infection, postpartum condition or complication              | 670.84              |
| Puerperal pyrexia of unknown origin, postpartum condition or complication          | 672.04              |
| Infection of breast/nipple associated with childbirth                              | 675.XX <sup>a</sup> |
| <i>Diseases of blood and blood-forming organs</i>                                  |                     |
| Neutropenia due to infection                                                       | 288.04              |
| <i>Diseases of esophagus, stomach, and duodenum</i>                                |                     |
| Infection of gastrostomy                                                           | 536.41              |
| Infection due to gastric band procedure                                            | 539.01              |

|                                                           |        |
|-----------------------------------------------------------|--------|
| <i>Diseases of male genital organs</i>                    |        |
| Acute prostatitis                                         | 601.0  |
| Abscess of prostate                                       | 601.2  |
| Orchitis/epididymitis                                     | 604.XX |
| <i>Diseases of oral cavity, salivary glands, and jaws</i> |        |
| Periapical abscess without sinus                          | 522.5  |
| Periapical abscess with sinus                             | 522.7  |
| Abscess of salivary glands                                | 527.3  |
| Cellulitis/abscess of oral soft tissue                    | 528.3  |
| <i>Diseases of the ear and mastoid process</i>            |        |
| Unspecified perichondritis of pinna                       | 380.00 |
| Acute perichondritis of pinna                             | 380.01 |
| Unspecified infective otitis externa                      | 380.10 |
| Acute infection of pinna                                  | 380.11 |
| Other acute infection of external ear                     | 380.13 |
| Other acute otitis externa                                | 380.22 |
| Unspecified acute nonsuppurative otitis media             | 381.00 |
| Acute serous otitis media                                 | 381.01 |
| Acute eustachian salpingitis                              | 381.51 |
| Acute suppurative otitis media                            | 382.0X |
| Unspecified suppurative otitis media                      | 382.4  |
| Unspecified otitis media                                  | 382.9  |
| Acute mastoiditis                                         | 383.0X |
| Petrositis                                                | 383.2X |
| Unspecified mastoiditis                                   | 383.9  |
| Acute myringitis without otitis media                     | 384.0X |
| Vestibular neuronitis                                     | 386.12 |
| Cerebrospinal fluid otorrhea                              | 388.61 |
| <i>Disorders of the eye and adnexa</i>                    |        |

|                                                                                    |                     |
|------------------------------------------------------------------------------------|---------------------|
| Vitreous abscess                                                                   | 360.04              |
| Sympathetic uveitis                                                                | 360.11              |
| Abscess of eyelid                                                                  | 373.13              |
| Other infective dermatitis of eyelid                                               | 373.5               |
| Unspecified dacryocystitis                                                         | 375.30              |
| Acute dacryocystitis                                                               | 375.32              |
| Orbital osteomyelitis                                                              | 376.03              |
| Inflammation (infection) of postprocedural bleb, unspecified                       | 379.60              |
| <i>Disorders of the peripheral nervous system</i>                                  |                     |
| Acute infective polyneuritis                                                       | 357.0               |
| <i>Ectopic and molar pregnancy and other pregnancy with abortive outcome</i>       |                     |
| Genital tract and pelvic infection following abortion or ectopic/molar pregnancies | 639.0               |
| <i>Homicide and injury purposely inflicted by other persons</i>                    |                     |
| Assault by human bite                                                              | E968.7              |
| <i>Infections of skin and subcutaneous tissue</i>                                  |                     |
| Acute lymphadenitis                                                                | 683.XX <sup>a</sup> |
| <i>Inflammatory disease of female pelvic organs</i>                                |                     |
| Acute salpingitis/oophoritis                                                       | 614.0               |
| Salpingitis/oophoritis not specified as acute/chronic                              | 614.2               |
| Acute parametritis/pelvic cellulitis                                               | 614.3               |
| Acute or unspecified pelvic peritonitis, female                                    | 614.5               |
| Acute inflammatory disease of uterus, except cervix                                | 615.0               |
| Abscess of Bartholin's gland                                                       | 616.3               |
| Other abscess of vulva                                                             | 616.4               |
| Other specified inflammatory diseases of cervix/vagina/vulva                       | 616.8X              |
| Unspecified inflammatory diseases of cervix/vagina/vulva                           | 616.9               |
| <i>Inflammatory diseases of the central nervous system</i>                         |                     |
| Bacterial meningitis                                                               | 320.XX              |
| Meningitis due to other organisms                                                  | 321.XX              |

|                                                                       |        |
|-----------------------------------------------------------------------|--------|
| Nonpyogenic meningitis                                                | 322.0  |
| Unspecified meningitis                                                | 322.9  |
| Encephalitis/encephalomyelitis in viral diseases classified elsewhere | 323.01 |
| Infectious acute disseminated encephalomyelitis                       | 323.61 |
| Intracranial/intraspinal abscess                                      | 324.XX |
| Late effects of intracranial abscess/pyogenic infection               | 326.XX |
| <i>Intestinal infectious diseases</i>                                 |        |
| Cholera                                                               | 001.XX |
| Typhoid/paratyphoid fever                                             | 002.XX |
| Other salmonella infection                                            | 003.XX |
| Shigellosis                                                           | 004.XX |
| Other food poisoning (bacterial)                                      | 005.XX |
| Amebiasis                                                             | 006.XX |
| Other protozoal intestinal disease                                    | 007.XX |
| Intestinal infection due to other organism                            | 008.XX |
| Ill-defined intestinal infection                                      | 009.XX |
| <i>Late effects of infectious and parasitic diseases</i>              |        |
| Late effects of viral encephalitis                                    | 139.0  |
| Late effects of other/unspecified infectious/parasitic diseases       | 139.8  |
| <i>Mycoses</i>                                                        |        |
| Dermatophytosis                                                       | 110.XX |
| Other/unspecified dermatomycosis                                      | 111.XX |
| Candidiasis                                                           | 112.XX |
| Coccidioidomycosis                                                    | 114.XX |
| Histoplasmosis                                                        | 115.XX |
| Blastomycotic infection                                               | 116.XX |
| Other mycoses                                                         | 117.XX |
| Opportunistic mycoses                                                 | 118.XX |
| <i>Nephritis, nephrotic syndrome, and nephrosis</i>                   |        |

|                                                                            |        |
|----------------------------------------------------------------------------|--------|
| Acute glomerulonephritis with proliferative lesion                         | 580.0  |
| Acute glomerulonephritis in diseases classified elsewhere                  | 580.81 |
| <i>Osteopathies, chondropathies, and acquired musculoskeletal diseases</i> |        |
| Osteomyelitis/periostitis/other bone infections                            | 730.XX |
| <i>Other accidents</i>                                                     |        |
| Accidental human bite                                                      | E928.3 |
| <i>Other bacterial diseases</i>                                            |        |
| Leprosy                                                                    | 030.XX |
| Other mycobacterial disease                                                | 031.XX |
| Diphtheria                                                                 | 032.XX |
| Whooping cough                                                             | 033.XX |
| Streptococcal sore throat/scarlet fever                                    | 034.XX |
| Meningococcal infection                                                    | 036.XX |
| Tetanus                                                                    | 037.XX |
| Septicemia                                                                 | 038.XX |
| Actinomycotic infection                                                    | 039.XX |
| Other bacterial disease                                                    | 040.XX |
| <i>Other diseases due to viruses and chlamydiae</i>                        |        |
| Viral hepatitis                                                            | 070.XX |
| Rabies                                                                     | 071.XX |
| Mumps                                                                      | 072.XX |
| Ornithosis                                                                 | 073.XX |
| Coxsackie viral disease                                                    | 074.XX |
| Infectious mononucleosis                                                   | 075.XX |
| Trachoma                                                                   | 076.XX |
| Other conjunctivitis due to virus/chlamydiae                               | 077.XX |
| Other disease due to virus/chlamydiae                                      | 078.XX |
| Viral/chlamydial infection elsewhere classified/NOS                        | 079.XX |
| <i>Other diseases of digestive system</i>                                  |        |

|                                                                         |                     |
|-------------------------------------------------------------------------|---------------------|
| Abscess of liver                                                        | 572.0               |
| <i>Other diseases of intestines and peritoneum</i>                      |                     |
| Abscess of anal/rectal regions                                          | 566.XX              |
| Other suppurative peritonitis                                           | 567.2X              |
| Retroperitoneal infection                                               | 567.3X              |
| Other specified peritonitis                                             | 567.8X              |
| Unspecified peritonitis                                                 | 567.9               |
| Abscess of intestine                                                    | 569.5               |
| Infection of colostomy/enterostomy                                      | 569.61              |
| Pouchitis                                                               | 569.71              |
| <i>Other diseases of respiratory system</i>                             |                     |
| Pleurisy with effusion, with mention of a bacterial cause other than TB | 511.1               |
| Abscess of lung/mediastinum                                             | 513.XX              |
| Respiratory bronchiolitis interstitial lung disease                     | 516.34              |
| Infection of tracheostomy                                               | 519.01              |
| <i>Other diseases of skin and subcutaneous tissue</i>                   |                     |
| Pressure ulcer                                                          | 707.0X <sup>a</sup> |
| Ulcer of lower limbs, except pressure ulcer                             | 707.1X <sup>a</sup> |
| Chronic ulcer of other specified sites                                  | 707.8X <sup>a</sup> |
| Chronic ulcer of unspecified site                                       | 707.9X <sup>a</sup> |
| <i>Other diseases of the upper respiratory tract</i>                    |                     |
| Peritonsillar abscess                                                   | 475.XX              |
| Cellulitis of pharynx/nasopharynx                                       | 478.21              |
| Parapharyngeal abscess                                                  | 478.22              |
| Retropharyngeal abscess                                                 | 478.24              |
| Cellulitis/perichondritis of larynx                                     | 478.71              |
| <i>Other diseases of urinary system</i>                                 |                     |
| Kidney infection                                                        | 590.XX              |
| Cystitis                                                                | 595.XX              |



|                                                       |        |
|-------------------------------------------------------|--------|
| Infection of cystostomy                               | 596.81 |
| Urethritis (non-STD)/urethral syndrome                | 597.XX |
| Urethral stricture due to unspecified infection       | 598.00 |
| Urinary tract infection, site not specified           | 599.0  |
| <i>Other forms of heart disease</i>                   |        |
| Acute pericarditis                                    | 420.XX |
| Acute/subacute endocarditis                           | 421.XX |
| Endocarditis, valve unspecified                       | 424.9X |
| <i>Other infectious and parasitic diseases</i>        |        |
| Toxoplasmosis                                         | 130.XX |
| Trichomoniasis                                        | 131.XX |
| Pediculosis/phthirus infection                        | 132.XX |
| Acariasis                                             | 133.XX |
| Other infestation                                     | 134.XX |
| Sarcoidosis                                           | 135.XX |
| Other/unspecified infectious/parasitic disease        | 136.XX |
| <i>Other spirochetal diseases</i>                     |        |
| Leptospirosis                                         | 100.XX |
| Vincent's angina                                      | 101.XX |
| Yaws                                                  | 102.XX |
| Pinta                                                 | 103.XX |
| Other spirochetal infection                           | 104.XX |
| <i>Pneumonia and influenza</i>                        |        |
| Viral pneumonia                                       | 480.XX |
| Pneumococcal pneumonia                                | 481.XX |
| Other bacterial pneumonia                             | 482.XX |
| Pneumonia due to other specified organism             | 483.XX |
| Pneumonia in infectious diseases classified elsewhere | 484.XX |
| Bronchopneumonia, organism unspecified                | 485.XX |

|                                                                    |        |
|--------------------------------------------------------------------|--------|
| Pneumonia, organism unspecified                                    | 486.XX |
| Influenza                                                          | 487.XX |
| Influenza due to certain identified flu viruses                    | 488.XX |
| <i>Polio &amp; other non-arthropod-borne viral diseases of CNS</i> |        |
| Acute poliomyelitis                                                | 045.XX |
| Slow virus infection/prion disease of CNS                          | 046.XX |
| Enteroviral meningitis                                             | 047.XX |
| Other enterovirus disease of CNS                                   | 048.XX |
| Other nonarthropod-borne viral disease of CNS                      | 049.XX |
| <i>Rheumatism, excluding the back</i>                              |        |
| Infective myositis                                                 | 728.0  |
| Necrotizing fasciitis                                              | 728.86 |
| Unspecified fasciitis                                              | 729.4  |
| <i>Rickettsioses and other arthropod-borne diseases</i>            |        |
| Louse-borne (epidemic) typhus                                      | 080.XX |
| Other typhus                                                       | 081.XX |
| Tick-borne rickettsioses                                           | 082.XX |
| Other rickettsioses                                                | 083.XX |
| Malaria                                                            | 084.XX |
| Leishmaniasis                                                      | 085.XX |
| Trypanosomiasis                                                    | 086.XX |
| Relapsing fever                                                    | 087.XX |
| Other arthropod-borne disease                                      | 088.XX |
| <i>Superficial injury</i>                                          |        |
| Infection nonvenomous insect bite on face/neck/scalp               | 910.5  |
| Infection nonvenomous insect bite on trunk                         | 911.5  |
| Infection nonvenomous insect bite on shoulder/upper arm            | 912.5  |
| Infection nonvenomous insect bite on elbow/forearm/wrist           | 913.5  |
| Infection nonvenomous insect bite on hand excluding finger alone   | 914.5  |

|                                                                    |        |
|--------------------------------------------------------------------|--------|
| Infection nonvenomous insect bite on finger                        | 915.5  |
| Infection nonvenomous insect bite on hip/thigh/leg/ankle           | 916.5  |
| Infection nonvenomous insect bite on foot/toe                      | 917.5  |
| Infection nonvenomous insect bite, other/multiple/unspecified site | 919.5  |
| <i>Symptoms</i>                                                    |        |
| Gangrene                                                           | 785.4  |
| <i>Syphilis and other venereal diseases</i>                        |        |
| Congenital syphilis                                                | 090.XX |
| Symptomatic early syphilis                                         | 091.XX |
| Latent early syphilis                                              | 092.XX |
| Cardiovascular syphilis                                            | 093.XX |
| Neurosyphilis                                                      | 094.XX |
| Other symptomatic late syphilis                                    | 095.XX |
| Latent late syphilis                                               | 096.XX |
| Other/unspecified syphilis                                         | 097.XX |
| Gonococcal infection                                               | 098.XX |
| Other venereal disease                                             | 099.XX |
| <i>Tuberculosis</i>                                                |        |
| Primary tuberculosis infection                                     | 010.XX |
| Pulmonary tuberculosis                                             | 011.XX |
| Other respiratory tuberculosis                                     | 012.XX |
| Tuberculosis of meninges/CNS                                       | 013.XX |
| Tuberculosis of intestines/peritoneum                              | 014.XX |
| Tuberculosis of bone/joint                                         | 015.XX |
| Tuberculosis of genitourinary system                               | 016.XX |
| Tuberculosis of other organs                                       | 017.XX |
| Miliary tuberculosis                                               | 018.XX |
| <i>Viral diseases accompanied by exanthem</i>                      |        |
| Smallpox                                                           | 050.XX |

|                                    |        |
|------------------------------------|--------|
| <i>Zoonotic bacterial diseases</i> |        |
| Plague                             | 020.XX |
| Tularemia                          | 021.XX |
| Anthrax                            | 022.XX |
| Brucellosis                        | 023.XX |
| Glanders                           | 024.XX |
| Melioidosis                        | 025.XX |
| Rat-bite fever                     | 026.XX |
| Other zoonotic bacterial disease   | 027.XX |

ABSSSI=acute bacterial skin and skin structure infection; CNS=central nervous system; FDA=US Food and Drug Administration; *ICD-9-CM=International Classification of Diseases, Ninth Revision, Clinical Modification*; NEC=not elsewhere classified; NOS=not otherwise specified; STD=sexually transmitted disease.

<sup>a</sup>Excluded only for primary diagnoses of ABSSSI consistent with FDA guidance.

**Supplementary Table 2. Spectrum of Activity of Antibiotic Agents**

| <b>Therapeutic Class/Antibiotic Agent</b> | <b>Spectrum of Activity</b> |
|-------------------------------------------|-----------------------------|
| <i>Aminoglycoside</i>                     |                             |
| Amikacin                                  | Non-MRSA coverage           |
| Gentamicin                                | Non-MRSA coverage           |
| Kanamycin                                 | Non-MRSA coverage           |
| Neomycin                                  | Non-MRSA coverage           |
| Netilmicin                                | Non-MRSA coverage           |
| Streptomycin                              | Non-MRSA coverage           |
| Tobramycin                                | Non-MRSA coverage           |
| <i>Carbapenem</i>                         |                             |
| Doripenem                                 | Non-MRSA coverage           |
| Ertapenem                                 | Non-MRSA coverage           |
| Imipenem                                  | Non-MRSA coverage           |
| Meropenem                                 | Non-MRSA coverage           |
| <i>Cephalosporin</i>                      |                             |
| Cefaclor                                  | Non-MRSA coverage           |
| Cefadroxil                                | Non-MRSA coverage           |
| Cefamandole                               | Non-MRSA coverage           |
| Cefazolin                                 | Non-MRSA coverage           |
| Cefdinir                                  | Non-MRSA coverage           |
| Cefepime                                  | Non-MRSA coverage           |
| Cefixime                                  | Non-MRSA coverage           |
| Cefoperazone                              | Non-MRSA coverage           |
| Cefotaxime                                | Non-MRSA coverage           |

|                                 |                   |
|---------------------------------|-------------------|
| Cefotetan                       | Non-MRSA coverage |
| Cefoxitin                       | Non-MRSA coverage |
| Cefpodoxime                     | Non-MRSA coverage |
| Cefprozil                       | Non-MRSA coverage |
| Ceftaroline                     | MRSA coverage     |
| Ceftazidime                     | Non-MRSA coverage |
| Ceftizoxime                     | Non-MRSA coverage |
| Ceftriaxone                     | Non-MRSA coverage |
| Cefuroxime                      | Non-MRSA coverage |
| Cephalexin                      | Non-MRSA coverage |
| Cephalothin                     | Non-MRSA coverage |
| Cephradine                      | Non-MRSA coverage |
| <i>Fluoroquinolone</i>          |                   |
| Cinoxacin                       | Non-MRSA coverage |
| Ciprofloxacin                   | Non-MRSA coverage |
| Gatifloxacin                    | Non-MRSA coverage |
| Levofloxacin                    | Non-MRSA coverage |
| Moxifloxacin                    | Non-MRSA coverage |
| Norfloxacin                     | Non-MRSA coverage |
| Ofloxacin                       | Non-MRSA coverage |
| Trovafloxacin                   | Non-MRSA coverage |
| <i>Glycopeptide/Lipopeptide</i> |                   |
| Daptomycin                      | MRSA coverage     |
| Telavancin                      | MRSA coverage     |
| Vancomycin                      | MRSA coverage     |

---

*Lincosamide*

Clindamycin

MRSA coverage

Lincomycin

Non-MRSA coverage

*Macrolide*

Azithromycin

Non-MRSA coverage

Clarithromycin

Non-MRSA coverage

Dirithromycin

Non-MRSA coverage

Erythromycin

Non-MRSA coverage

*Other*

Aztreonam

Non-MRSA coverage

Chloramphenicol

Non-MRSA coverage

Colistimethate

Non-MRSA coverage

Fidaxomicin

Non-MRSA coverage

Metronidazole

Non-MRSA coverage

Quinupristin/dalfopristin

MRSA coverage

Tigecycline

MRSA coverage

Trimethoprim

Non-MRSA coverage

*Oxazolidinone*

Linezolid

MRSA coverage

*Penicillin*

Amoxicillin

Non-MRSA coverage

Ampicillin

Non-MRSA coverage

Dicloxacillin

Non-MRSA coverage

Nafcillin

Non-MRSA coverage

Oxacillin

Non-MRSA coverage

---

|                                                          |                   |
|----------------------------------------------------------|-------------------|
| Penicillin g                                             | Non-MRSA coverage |
| Penicillin v                                             | Non-MRSA coverage |
| Piperacillin                                             | Non-MRSA coverage |
| Ticarcillin                                              | Non-MRSA coverage |
| <i>Penicillin/<math>\beta</math>-lactamase inhibitor</i> |                   |
| Amoxicillin/clavulanate                                  | Non-MRSA coverage |
| Ampicillin/sulbactam                                     | Non-MRSA coverage |
| Piperacillin/tazobactam                                  | Non-MRSA coverage |
| Ticarcillin/clavulanate                                  | Non-MRSA coverage |
| <i>Sulfonamide</i>                                       |                   |
| Sulfadiazine                                             | Non-MRSA coverage |
| Sulfamethizole                                           | Non-MRSA coverage |
| Sulfamethoxazole                                         | Non-MRSA coverage |
| Sulfamethoxazole/trimethoprim                            | MRSA coverage     |
| Sulfanilamide                                            | Non-MRSA coverage |
| Sulfasalazine                                            | Non-MRSA coverage |
| Sulfisoxazole                                            | Non-MRSA coverage |
| <i>Tetracycline</i>                                      |                   |
| Demeclocycline                                           | Non-MRSA coverage |
| Doxycycline                                              | MRSA coverage     |
| Minocycline                                              | MRSA coverage     |
| Tetracycline                                             | Non-MRSA coverage |

---

MRSA=methicillin-resistant *Staphylococcus aureus*.



**Supplementary Table 3. The 5 Most Common Secondary Diagnoses and Procedures for ABSSSI Patients in 2014**

| <b>ICD-9 Diagnostic Code</b>            | <b>Description</b>                                           | <b>n (%)<sup>a</sup></b> |
|-----------------------------------------|--------------------------------------------------------------|--------------------------|
| Secondary <i>ICD-9</i> diagnostic codes |                                                              |                          |
| 401.9                                   | Essential hypertension                                       | 23,824 (40.6)            |
| 272.4                                   | Hyperlipidemia, other and unspecified                        | 14,806 (25.2)            |
| 305.1                                   | Tobacco use disorder                                         | 14,273 (24.3)            |
| 250.00                                  | Type II diabetes mellitus, uncomplicated                     | 11,025 (18.8)            |
| 530.81                                  | Esophageal reflux                                            | 9039 (15.4)              |
| <i>ICD-9</i> procedure codes            |                                                              |                          |
| 86.04                                   | Other incision with drainage of skin and subcutaneous tissue | 12,062 (20.6)            |
| 86.22                                   | Excisional debridement of wound, infection, or burn          | 2963 (5.0)               |
| 38.93                                   | Venous catheterization, NEC                                  | 2854 (4.9)               |
| 38.97                                   | Central venous catheter placement w/ guidance                | 2717 (4.6)               |
| 99.21                                   | Injection of antibiotic                                      | 2547 (4.3)               |

ABSSSI=acute bacterial skin and skin structure infection; *ICD-9*=*International Classification of Diseases, Ninth Revision*; NEC=not elsewhere classified.

<sup>a</sup>Categories are not mutually exclusive, patients may have had more than one secondary diagnosis or more than one procedure.

**Supplementary Table 4. Patient, Treatment, Hospital, and Economic Characteristics of ABSSSI Admissions in 2014 by Length of Stay**

| Characteristic                     | 1 Day | 2 Days | 3 Days | 4 Days | ≥5 Days | P Value |
|------------------------------------|-------|--------|--------|--------|---------|---------|
| <i>Patient characteristics</i>     |       |        |        |        |         |         |
| Number of hospital admissions      | 6736  | 12,641 | 13,118 | 9045   | 17,142  |         |
| Mean age, years                    | 48.9  | 51.8   | 54.7   | 56.4   | 59.3    |         |
| Age group, %                       |       |        |        |        |         |         |
| 18–34 years                        | 25.8  | 20.8   | 16.4   | 13.9   | 28.8    | <0.01   |
| 35–44 years                        | 18.5  | 16.6   | 15.1   | 13.9   | 20.0    |         |
| 45–54 years                        | 19.8  | 19.6   | 19.4   | 18.3   | 21.6    |         |
| 55–64 years                        | 15.0  | 17.2   | 17.5   | 19.3   | 14.7    |         |
| 65–74 years                        | 10.2  | 12.6   | 14.4   | 15.9   | 8.3     |         |
| ≥75 years                          | 10.7  | 13.3   | 17.2   | 18.7   | 6.7     |         |
| Men, %                             | 56.9  | 54.6   | 53.3   | 51.6   | 49.1    | <0.01   |
| Mean CCI score                     | 1.0   | 1.2    | 1.3    | 1.6    | 2.0     |         |
| CCI scores, %                      |       |        |        |        |         |         |
| 0                                  | 58.1  | 53.7   | 47.9   | 42.3   | 32.6    | <0.01   |
| 1                                  | 11.5  | 11.0   | 11.8   | 12.0   | 12.0    |         |
| 2                                  | 17.7  | 19.8   | 21.2   | 22.2   | 22.4    |         |
| 3                                  | 5.6   | 6.5    | 7.8    | 9.4    | 11.2    |         |
| ≥4                                 | 7.2   | 8.9    | 11.4   | 14.2   | 21.8    |         |
| Most common comorbid conditions, % |       |        |        |        |         |         |

|                                                     |      |      |      |      |      |       |
|-----------------------------------------------------|------|------|------|------|------|-------|
| Diabetes                                            | 23.0 | 26.0 | 29.1 | 32.9 | 37.1 | <0.01 |
| Renal disease                                       | 8.2  | 10.6 | 13.4 | 15.9 | 24.5 | <0.01 |
| Chronic pulmonary disease                           | 10.3 | 9.8  | 10.2 | 10.5 | 12.1 | <0.01 |
| Congestive heart failure                            | 5.0  | 5.9  | 8.1  | 10.4 | 14.9 | <0.01 |
| Peripheral vascular disease                         | 3.5  | 4.3  | 5.6  | 7.0  | 9.8  | <0.01 |
| Proxy severity of disease, %                        |      |      |      |      |      |       |
| Admitted to the ICU                                 | 1.5  | 1.8  | 2.0  | 2.7  | 5.9  | <0.01 |
| Used corticosteroids on admission days 1–2          | 5.5  | 7.1  | 6.8  | 6.4  | 5.8  | <0.01 |
| Received parenteral nutrition on admission days 1–2 | 2.1  | 2.7  | 3.4  | 3.9  | 5.2  | <0.01 |
| Used vasoactive medications on admission days 1–2   | 1.1  | 1.4  | 1.6  | 2.2  | 2.9  | <0.01 |
| Insurance type, %                                   |      |      |      |      |      |       |
| Medicare                                            | 30.2 | 34.2 | 39.7 | 44.0 | 50.2 | <0.01 |
| Medicaid                                            | 22.4 | 18.9 | 16.8 | 16.2 | 16.1 |       |
| Managed care/commercial indemnity                   | 27.4 | 30.9 | 29.1 | 26.2 | 22.3 |       |
| Self-pay                                            | 14.3 | 10.2 | 9.0  | 8.1  | 6.5  |       |
| Other or N/A                                        | 5.8  | 5.9  | 5.5  | 5.5  | 4.9  |       |
| Admission type, %                                   |      |      |      |      |      |       |
| Emergency or urgent                                 | 91.7 | 90.1 | 89.9 | 89.3 | 88.5 | <0.01 |
| Elective                                            | 7.6  | 9.1  | 9.3  | 10.0 | 10.6 |       |

|                                                                                        |      |      |      |      |      |       |
|----------------------------------------------------------------------------------------|------|------|------|------|------|-------|
| Trauma center                                                                          | 0.1  | 0.0  | 0.1  | 0.0  | 0.1  |       |
| Other or N/A                                                                           | 0.6  | 0.7  | 0.8  | 0.8  | 0.8  |       |
| Admission source, %                                                                    |      |      |      |      |      |       |
| Nonhealthcare setting                                                                  | 83.9 | 81.1 | 80.7 | 80.4 | 77.2 | <0.01 |
| Clinic                                                                                 | 7.1  | 9.2  | 9.2  | 9.1  | 9.8  |       |
| Transfer from other facility or other<br>department within the same hospital           | 6.3  | 6.1  | 6.6  | 7.1  | 9.7  |       |
| Other or N/A                                                                           | 2.7  | 3.6  | 3.5  | 3.4  | 3.3  |       |
| Discharge status, %                                                                    |      |      |      |      |      |       |
| Home or self-care                                                                      | 86.1 | 83.3 | 74.2 | 65.5 | 50.3 | <0.01 |
| Home health service                                                                    | 8.9  | 13.0 | 17.9 | 23.9 | 29.5 |       |
| Discharged/transferred to other facility<br>(including planned readmission)            | 4.5  | 3.3  | 7.3  | 9.9  | 19.1 |       |
| Hospice                                                                                | 0.2  | 0.2  | 0.2  | 0.3  | 0.6  |       |
| Patient died                                                                           | 0.2  | 0.1  | 0.1  | 0.1  | 0.2  |       |
| Other or N/A                                                                           | 0.1  | 0.2  | 0.3  | 0.4  | 0.3  |       |
| Treatment characteristics                                                              |      |      |      |      |      |       |
| Therapeutic class of antibiotic therapy received on admission days 1–2, <sup>a</sup> % |      |      |      |      |      |       |
| Glycopeptide/lipopeptide                                                               | 65.0 | 72.1 | 75.5 | 77.8 | 76.6 | <0.01 |
| Penicillin/β-lactamase inhibitor                                                       | 34.8 | 37.4 | 39.1 | 40.0 | 41.9 | <0.01 |
| Cephalosporin                                                                          | 24.8 | 29.1 | 31.4 | 32.1 | 31.4 | <0.01 |
| Lincosamide                                                                            | 24.7 | 23.9 | 22.1 | 21.0 | 19.3 | <0.01 |

|                                                                     |      |      |      |      |      |       |
|---------------------------------------------------------------------|------|------|------|------|------|-------|
| Fluoroquinolone                                                     | 6.9  | 7.6  | 8.0  | 8.2  | 9.6  | <0.01 |
| Other <sup>b</sup>                                                  | 16.8 | 16.9 | 16.0 | 18.1 | 19.6 | <0.01 |
| Received anti-MRSA antibiotic on admission days 1–2, <sup>a</sup> % | 83.0 | 86.2 | 87.3 | 88.3 | 87.2 | <0.01 |
| <i>Hospital characteristics</i>                                     |      |      |      |      |      |       |
| Geographic region, %                                                |      |      |      |      |      |       |
| New England                                                         | 5.1  | 5.2  | 4.6  | 4.4  | 3.8  | <0.01 |
| Middle Atlantic                                                     | 18.1 | 15.8 | 14.8 | 14.5 | 15.8 |       |
| East-North Central                                                  | 17.6 | 15.7 | 14.5 | 14.2 | 11.9 |       |
| West-North Central                                                  | 5.0  | 5.8  | 5.4  | 5.3  | 4.5  |       |
| South Atlantic                                                      | 29.7 | 30.4 | 32.2 | 33.2 | 32.7 |       |
| East-South Central                                                  | 5.6  | 7.0  | 7.5  | 7.3  | 7.5  |       |
| West-South Central                                                  | 8.7  | 9.5  | 10.5 | 10.6 | 12.4 |       |
| Mountain                                                            | 1.8  | 2.4  | 2.7  | 2.4  | 2.4  |       |
| Pacific                                                             | 8.4  | 8.3  | 7.9  | 8.1  | 9.1  |       |
| Hospital teaching status, %                                         |      |      |      |      |      |       |
| Teaching                                                            | 44.2 | 39.3 | 37.4 | 37.2 | 39.6 | <0.01 |
| Nonteaching                                                         | 55.8 | 60.7 | 62.6 | 62.8 | 60.4 |       |
| Urban vs rural, %                                                   |      |      |      |      |      |       |
| Urban                                                               | 85.5 | 84.3 | 83.8 | 84.2 | 84.9 | <0.01 |
| Rural                                                               | 14.5 | 15.7 | 16.2 | 15.8 | 15.1 |       |
| Hospital size, %                                                    |      |      |      |      |      |       |

|                                                   |      |      |      |      |        |       |
|---------------------------------------------------|------|------|------|------|--------|-------|
| Small, <100 beds                                  | 6.7  | 6.6  | 6.4  | 5.5  | 4.6    | <0.01 |
| Medium, 100–399 beds                              | 50.7 | 52.6 | 53.4 | 52.7 | 50.6   |       |
| Large, ≥400 beds                                  | 42.6 | 40.8 | 40.2 | 41.8 | 44.8   |       |
| <i>Economic characteristics</i>                   |      |      |      |      |        |       |
| Mean total costs per admission, \$                | 2040 | 3382 | 4800 | 6234 | 11,652 | <0.01 |
| Room costs                                        | 861  | 1713 | 2541 | 3406 | 6419   |       |
| Operating room, surgery, emergency services       | 414  | 515  | 626  | 799  | 1294   |       |
| Laboratory and diagnostic procedures and services | 183  | 266  | 350  | 424  | 721    |       |
| Non-antibiotic medication acquisition             | 140  | 228  | 390  | 450  | 946    |       |
| Specialty and therapeutic procedures and services | 118  | 165  | 228  | 294  | 631    |       |
| Antibiotic medication acquisition                 | 95   | 183  | 261  | 340  | 667    |       |
| Radiology and imaging procedures and services     | 90   | 118  | 155  | 194  | 332    |       |
| Other                                             | 85   | 125  | 173  | 250  | 556    |       |
| Parenteral medication administration              | 54   | 68   | 75   | 77   | 88     |       |

---

ABSSSI=acute bacterial skin and skin structure infection; CCI=Charlson Comorbidity Index; ICU=intensive care unit; MRSA=methicillin-resistant *Staphylococcus aureus*; N/A=not applicable.

<sup>a</sup>The denominator for this section is the number of hospital admissions with antibiotic therapy on admission days 1–2.

<sup>b</sup>Other includes aminoglycosides, carbapenems, macrolides, oxazolidinone, penicillin, sulfonamides, and/or tetracyclines.

**Supplementary Table 5. Treatment Characteristics of ABSSSI Admissions<sup>a</sup> in 2014**

| <b>Treatment Characteristics, n (%)</b>                                                                              | <b>Admissions (N=58,682)</b> |
|----------------------------------------------------------------------------------------------------------------------|------------------------------|
| <b>Received parenteral antibiotics with only MRSA coverage</b>                                                       | 17,397 (29.6)                |
| With oral antibiotics with MRSA coverage                                                                             | 1232 (2.1)                   |
| With oral antibiotics without MRSA coverage                                                                          | 631 (1.1)                    |
| With oral antibiotics with MRSA and non-MRSA coverage                                                                | 112 (0.2)                    |
| No oral or other antibiotics                                                                                         | 15,057 (25.7)                |
| With other route <sup>b</sup>                                                                                        | 365 (0.6)                    |
| <b>Received parenteral antibiotics with only non-MRSA coverage</b>                                                   | 8161 (13.9)                  |
| With oral antibiotics with MRSA coverage                                                                             | 547 (0.9)                    |
| With oral antibiotics with non-MRSA coverage                                                                         | 395 (0.7)                    |
| With oral antibiotics with MRSA and non-MRSA coverage                                                                | 61 (0.1)                     |
| With no oral or antibiotics with other routes <sup>b</sup>                                                           | 6931 (11.8)                  |
| With other route <sup>b</sup>                                                                                        | 227 (0.4)                    |
| <b>Received parenteral antibiotics with both MRSA and non-MRSA coverage (regardless of oral antibiotic received)</b> | 30,451 (51.9)                |
| <b>Other<sup>c</sup></b>                                                                                             | 133 (0.2)                    |
| <b>Did not receive antibiotics</b>                                                                                   | 2051 (3.5)                   |
| <b>Received only oral antibiotic therapy</b>                                                                         | 489 (0.8)                    |
| With MRSA coverage                                                                                                   | 296 (0.5)                    |
| Without MRSA coverage                                                                                                | 139 (0.2)                    |

---

IV=intravenous; MRSA=methicillin-resistant *Staphylococcus aureus*.

Categories and values in **boldface** represent the totals of their respective subcategories and are mutually exclusive.

<sup>a</sup>Treatment assessed on days 1–2 of admission.

<sup>b</sup>Refers to the Premier antibiotic route category of ‘other’, that is, nonoral and non-IV antibiotic therapy.

<sup>c</sup>Refers to admissions in which the patient received both oral and antibiotic with other route or they received only antibiotics with other route.
